# Supplementary material for: Synthesis of triphenylamine based polysiloxane as a blue phosphorescent host
Source: Royal Society of Chemistry journal article supplement (doi:10.1039/c4py00450g), 2014-01-01
Supplement: c4py00450g1.pdf [file c4py00450g1.pdf]

## Supporting Information

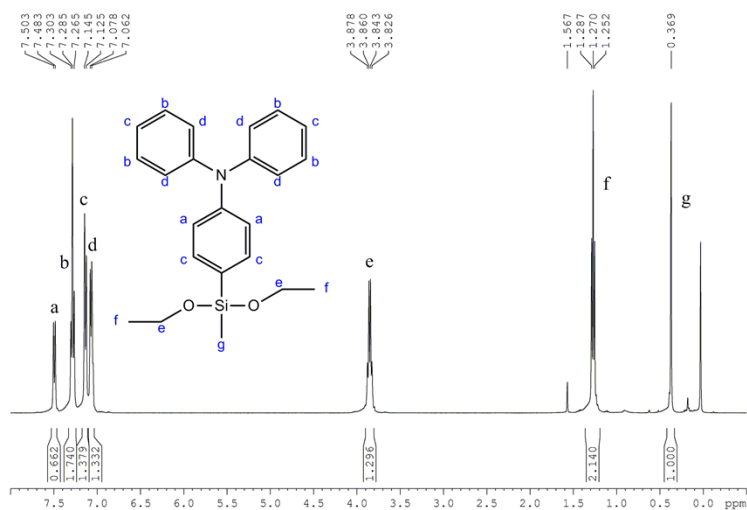

**Figure S1.** <sup>1</sup>H NMR spectrum of 4-(diethoxy(methyl)silyl)-N,N-diphenylaniline

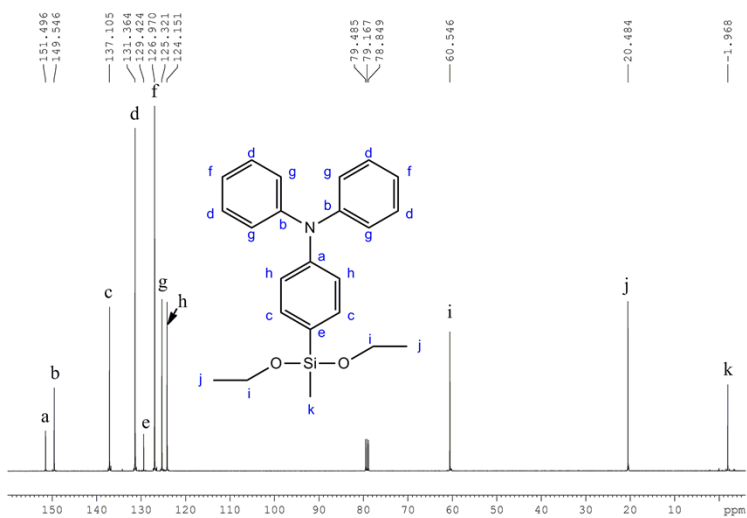

**Figure S2.** <sup>13</sup>C NMR spectrum of 4-(diethoxy(methyl)silyl)-N,N-diphenylaniline

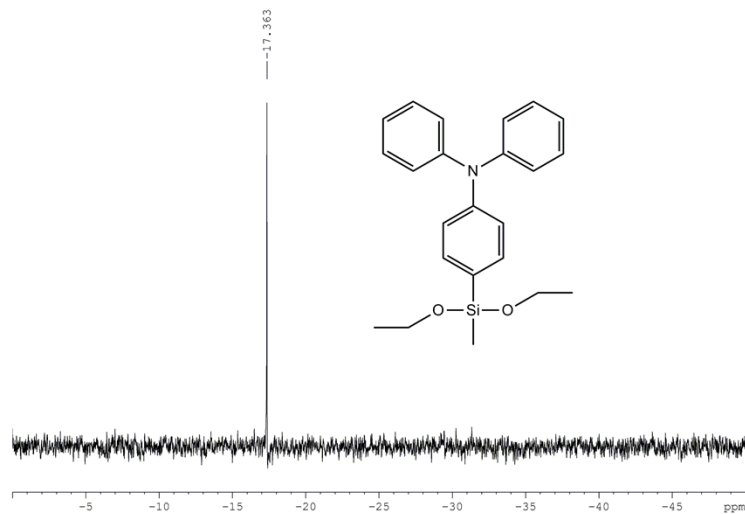

**Figure S3.**  $^{29}\text{Si}$  NMR spectrum of 4-(diethoxy(methyl)silyl)-N,N-diphenylaniline

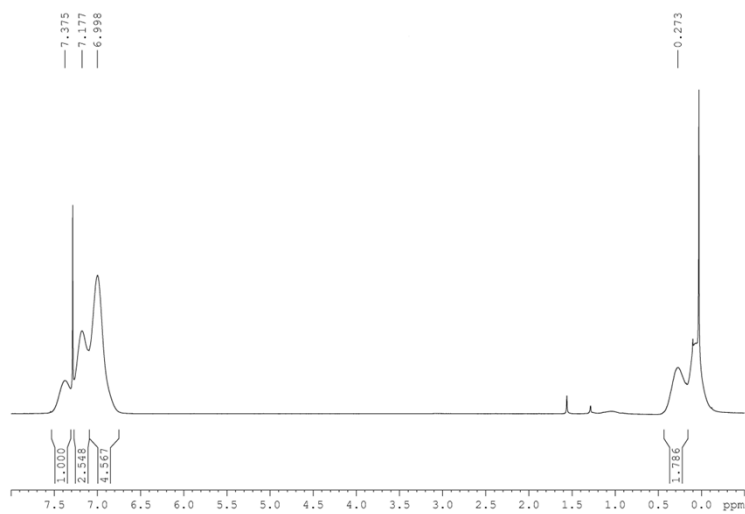

**Figure S4.**  $^1\text{H}$  NMR spectrum of PTPAMSi
